# Supplementary material for: Crystal structure and optical characterization of a new hybrid compound, C6H9N2FeCl4, with large dielectric constants for field-effect transistors
Source: Royal Society of Chemistry journal article supplement (doi:10.1039/d3ra01239e), 2023-01-01
Supplement: d3ra01239e1.pdf [file d3ra01239e1.pdf]

**Supplementary material for**  
**Crystal structure and optical characterization of a new hybrid compound, C<sub>6</sub>H<sub>9</sub>N<sub>2</sub>FeCl<sub>4</sub>,**  
**with large dielectric constants for Field-Effect Transistors**

A. Ghoudi<sup>1</sup>, Kh. Ben Brahim<sup>1</sup>, H. Ghalla<sup>2</sup>, J. Lhoste<sup>3</sup>, S. Auguste<sup>3</sup>, K. khirouni<sup>4</sup>, A.  
Aydi<sup>1</sup>, A. Oueslati<sup>1</sup>

<sup>1</sup>Laboratory for Spectroscopic Characterization and Optics of Materials, Faculty of Sciences, University of Sfax, B. P. 1171, 3000 Sfax, Tunisia.

<sup>2</sup>Quantum and Statistical Physics Laboratory, Faculty of Sciences, University of Monastir, Monastir 5079, Tunisia

<sup>3</sup>Institut des Molécules et Matériaux du Mans (IMMM), UMR-6283 CNRS, Le Mans Université, Avenue Olivier Messiaen, 72085 Le Mans Cedex 9, France

<sup>4</sup>Laboratoire de Physique des Matériaux et des Nanomatériaux appliquée à l'Environnement, Faculté des Sciences de Gabes, Université de Gabes, cite Erriadh, 6079, Gabes, Tunisia

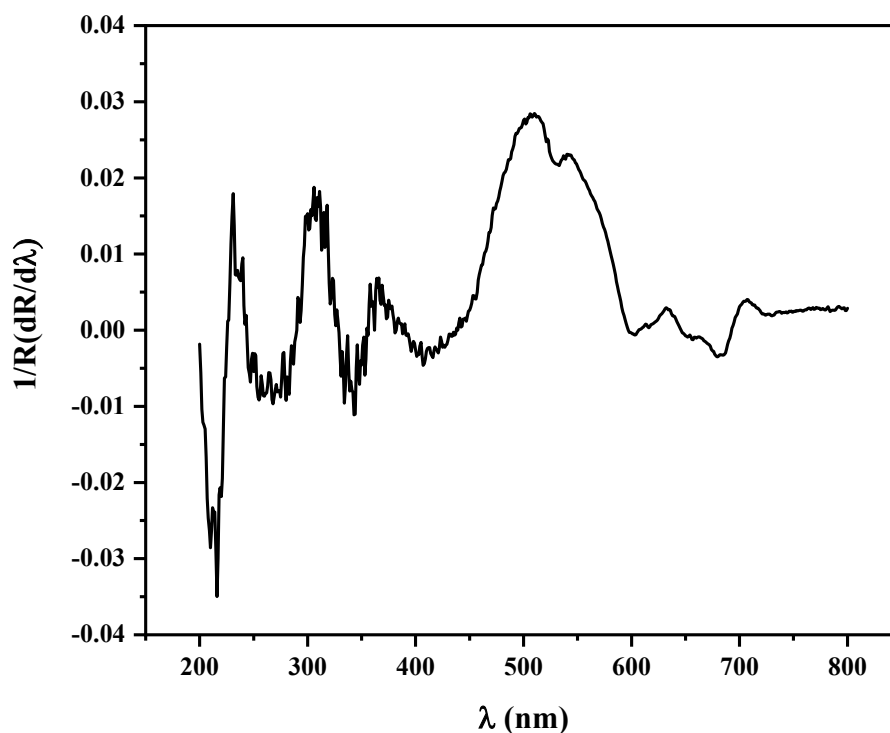

**Figure S1:** Variation of  $(1/R)(dR/d\lambda)$  as a function of wavelength.

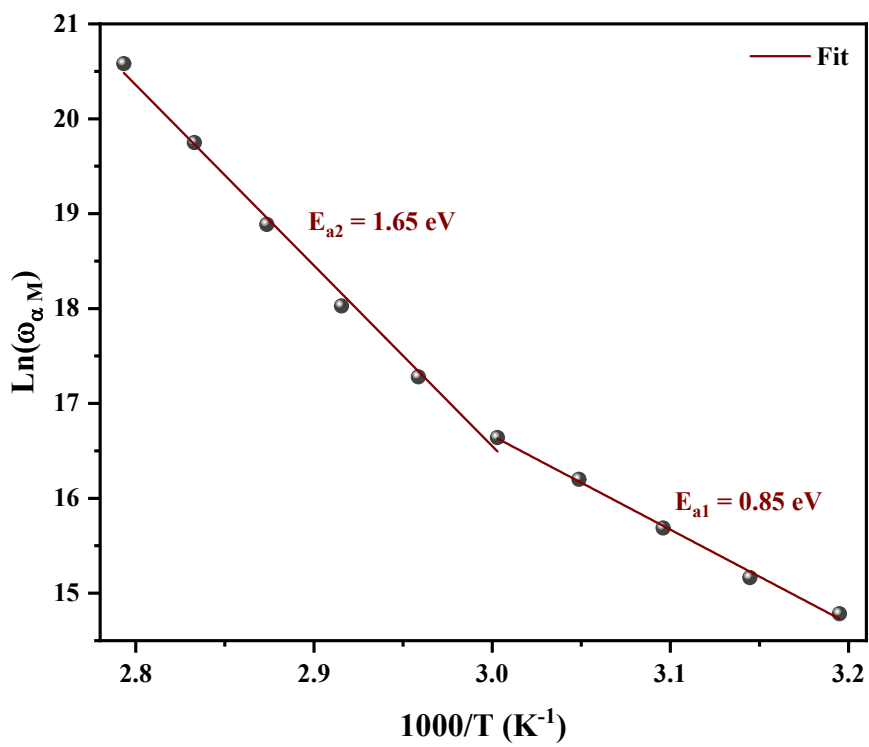

**Figure S2:** The variation of  $\text{Ln}(\omega_{\alpha M})$  versus the inverse of temperature.
